# Supplementary material for: Zebrafish Embryos Display Characteristic Bioelectric Signals during Early Development
Source: MDPI journal article supplement (doi:10.3390/cells11223586), 2022-11-12
Supplement: s1 [file s1]

## Appendix A. Supplementary file list

**Figure S1. Unfertilized Egg Vm signaling,  $\Delta F/F$ , and diagonal pattern of 4-cell stage fish embryo.** A–H. Still-frame representative max-projection images from a time-lapse video (Supplementary Video 3-4) of an unfertilized Tg (*ubi: ASAP1*) zebrafish embryo imaged from the animal pole position. The white arrowheads point to random Vm transient spots. I.  $\Delta F/F$  quantifications of ROIs in panels H–N of Figure 2. J.  $\Delta F/F$  quantifications of ROIs in panels O–U of Figure 2. All lines in panels I and J represent the standard change in fluorescence intensity of ROIs for the designated cleavage furrows over time. K–N. Representative Vm images from a 4-8 cell stage fish embryo showing a different pattern of furrow signaling (the second signal was diagonal from the initial). Scale Bar= 250  $\mu\text{m}$ .

**Figure S2. Deep cell Vm transient during the 30% epiboly period.** A-F. Time-lapse images of a 30% epiboly gastrula period embryo imaged with a single Z-plane through the center (lateral position). White arrows point to the hyperpolarized cells present within the deep cells. Scale Bar= 250  $\mu\text{m}$ .

**Video S1. Light-sheet imaging of Vm signaling during 2-4 cell cleavage stage in Tg (*ubi: ASAP1*).** This video shows max projections from the animal pole view of ASAP1 fluorescence localized at the cleavage furrows during positioning, propagation, and deepening processes.

**Video S2. Light-sheet imaging of Vm signaling during 4-8 cell cleavage stage in Tg (*ubi: ASAP1*).** This video shows ASAP1 fluorescence localized at the cleavage furrows from the animal pole view.

**Video S3. Light-sheet imaging of Vm signaling during 8-16 cell cleavage stage in Tg (*ubi: ASAP1*).** This video shows ASAP1 fluorescence localized at the cleavage furrows from the animal pole view.

**Video S4. Light-sheet imaging of Vm signaling in unfertilized Tg (*ubi: ASAP1*).** This video shows ASAP1 fluorescence signals occurring within an unfertilized embryo from the animal pole view.

**Video S5. Light-sheet imaging of Vm signaling during early blastula stage in Tg (*ubi: ASAP1*).** This video shows ASAP1 transient fluorescent signals occurring over the surface of an embryo from the lateral view.

**Video S6. Light-sheet imaging of Vm signaling limited to superficial blastomere during early blastula stage in Tg (*ubi*: ASAP1).** This video shows a single z-slice ASAP1 transient fluorescent signals limited to the superficial blastomere margins of an embryo from the lateral view.

**Video S7. Light-sheet imaging of intercellular Vm signaling during early blastula stage in Tg (*ubi*: ASAP1).** This video shows ASAP1 transient fluorescent signals occurring followed by adjacent signals signaling in seemingly an intercellular correlation.

**Video S8. Light-sheet imaging of Vm signaling during gastrula stage in Tg (*ubi*: ASAP1).** This video shows Vm transients in the EVL and YSL from the early to late gastrula stage in a dorsal-to-lateral view.

**Video S9. Light-sheet imaging of Vm signaling within deeper cell layers during gastrula stage in Tg (*ubi*: ASAP1).** This video shows Vm transients occurring within deeper cell layers during mid-gastrulation.

**Video S10. Light-sheet imaging of Vm signaling during the early segmentation stage in Tg (*ubi*: ASAP1).** This video starts at the end of gastrulation and shows Vm signals becoming stronger in certain tissue regions, such as the somites.

**Video S11. Light-sheet imaging of left lateral Vm signaling during somite stage in Tg (*ubi*: ASAP1).** This video shows a continuation of Vm transients, dynamic somite hyperpolarizations, and increased signals in the developing heart from the left lateral view.

**Video S12. Light-sheet imaging of dorsal Vm signaling during the somite stage in Tg (*ubi*: ASAP1).** This video shows a continuation of Vm transients and dynamic unilateral or bilateral, whole and/or partial somite signals from the dorsal view.
